# Supplementary material for: Anchored RuSe2nanospheres on Co–N–C nanosheets boost electrocatalytic alkaline hydrogen evolution
Source: Royal Society of Chemistry journal article supplement (doi:10.1039/d2ce01409b), 2023-01-01
Supplement: d2ce01409b1.pdf [file d2ce01409b1.pdf]

## Supporting Information

### **Anchored RuSe<sub>2</sub> Nanospheres on Co-N-C Nanosheets Boost Electrocatalytic Alkaline Hydrogen Evolution**

Nan Li,<sup>\*a</sup> Minghao Shi,<sup>a</sup> Wei Zhan,<sup>a</sup> Wenjing Shen,<sup>a</sup> Mianmian Wu,<sup>a</sup> Guifang Sun,<sup>a</sup>

Qingfei Li,<sup>a</sup> and Jiangquan Ma<sup>\*a</sup>

Jiangsu Province Advanced Catalysis and Green Manufacturing Collaborative  
Innovation Center, Changzhou University, Changzhou, Jiangsu Province 213164,  
China.

\*Corresponding author

Tel: +86 13951221008, E-mail: [majiangquan@126.com](mailto:majiangquan@126.com)

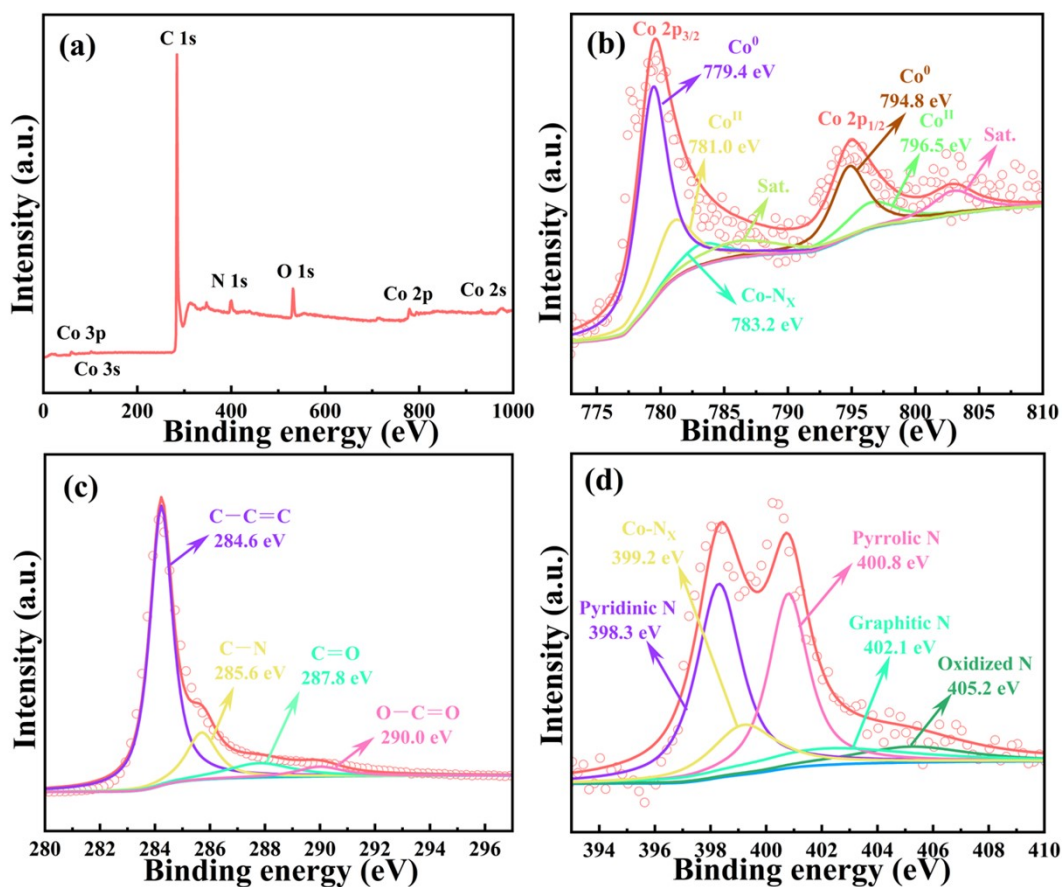

**Fig. S1.** XPS spectra of Co-N-C. (a) Survey scan, (b) Co 2p , (c) C 1s and (d) N 1s spectrum.

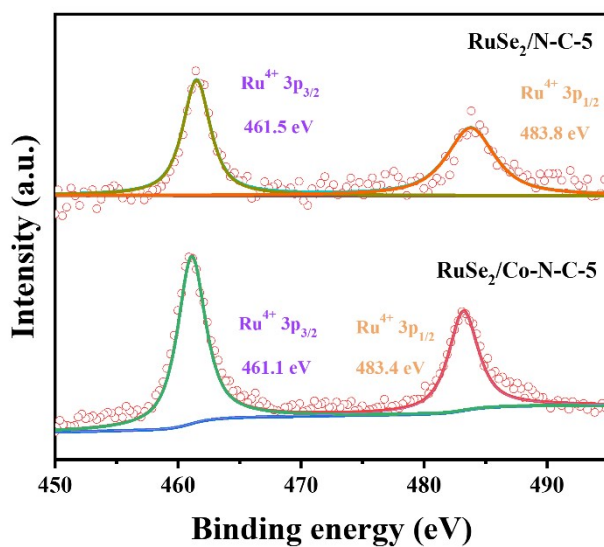

**Fig. S2.** Ru 3p spectra of RuSe<sub>2</sub>/Co-N-C-5 and RuSe<sub>2</sub>/N-C-5.

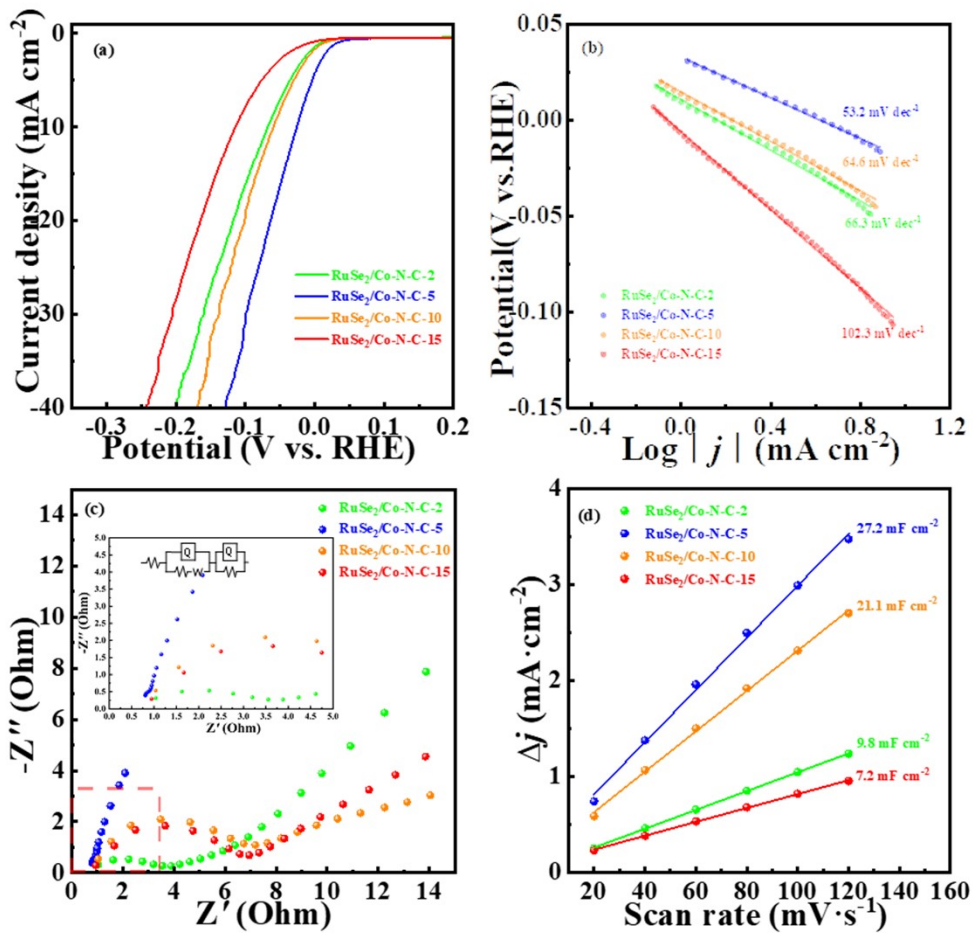

**Fig. S3.** HER performance of different catalysts in 1.0 KOH. (a) Polarization curves, (b) Tafel slopes, (c) EIS curves and (d) double-layer capacitance ( $C_{dl}$ ).

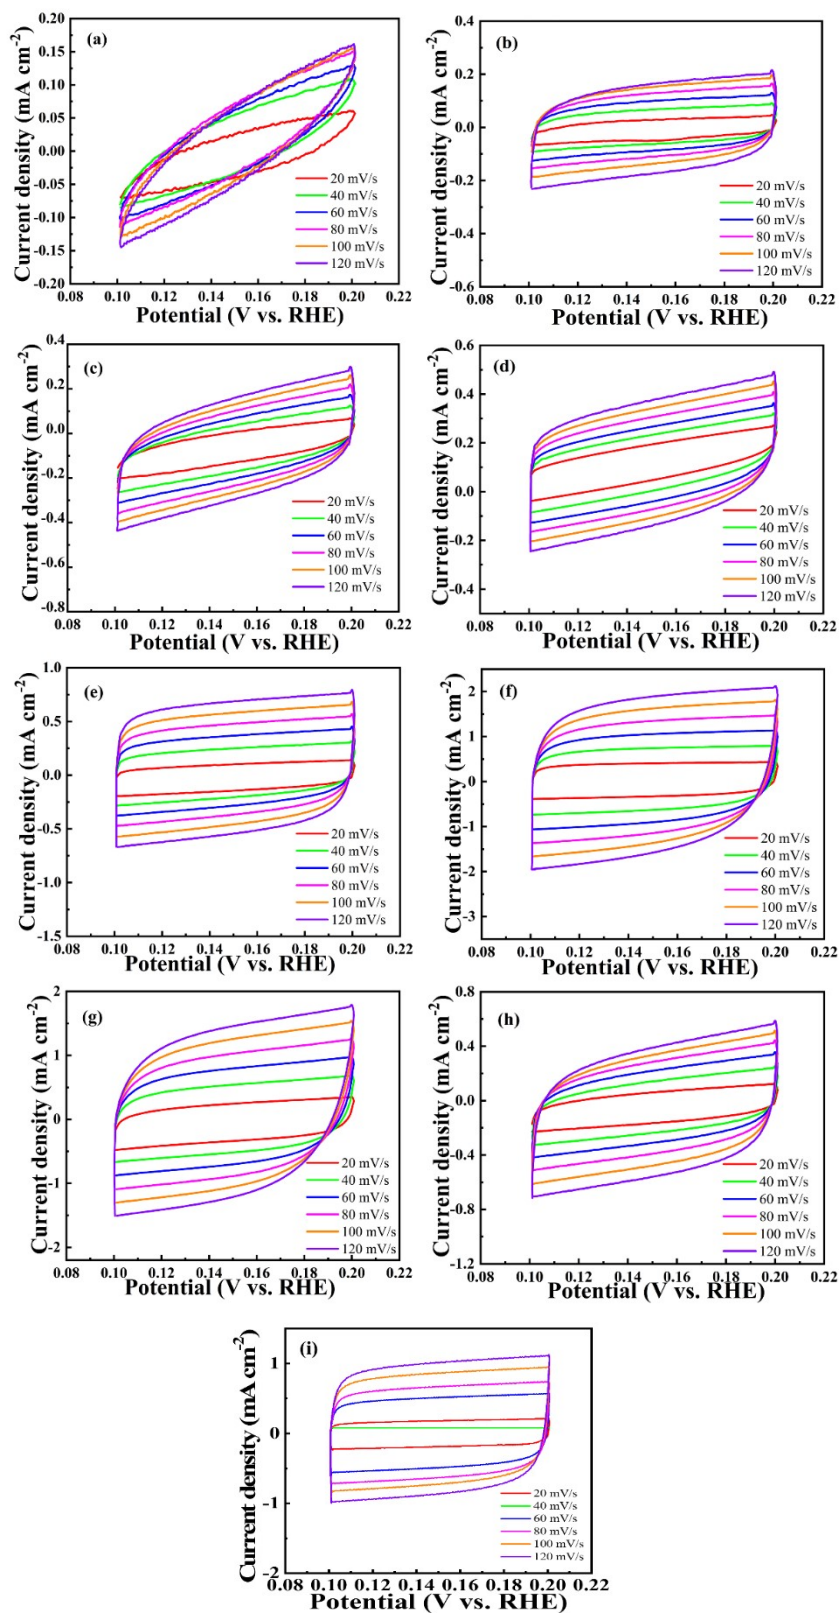

**Fig. S4.** CV curves of (a) Co-N-C, (b) Fresh RuSe<sub>2</sub>, (c) RuSe<sub>2</sub>-400, (d) Fresh RuSe<sub>2</sub>/Co-N-C-5, (e) RuSe<sub>2</sub>/Co-N-C-2, (f) RuSe<sub>2</sub>/Co-N-C-5, (g) RuSe<sub>2</sub>/Co-N-C-10, (h) RuSe<sub>2</sub>/Co-N-C-15 and (i) RuSe<sub>2</sub>/N-C-5 at different scan rates.

**Table S1.** Comparison of HER performance for RuSe<sub>2</sub>/Co-N-C-5 in this work and recently reported HER electrocatalysts in 1 M KOH.

| Catalyst                                           | Substrate | Tafel slope<br>(mV dec <sup>-1</sup> ) | Overpotential<br>(mV@10 mA cm <sup>-2</sup> ) | Ref          |
|----------------------------------------------------|-----------|----------------------------------------|-----------------------------------------------|--------------|
| RuSe <sub>2</sub> /g-C <sub>3</sub> N <sub>4</sub> | GC        | 74.8                                   | 95                                            | S1           |
| RuSe <sub>2</sub> @NC                              | GC        | 32                                     | 30                                            | S2           |
| <i>h</i> -RuSe <sub>2</sub>                        | GC        | 95                                     | 34                                            | S3           |
| RuSe <sub>2</sub> -500                             | GC        | 53                                     | 29                                            | S4           |
| RuSe <sub>2</sub> /CNTs                            | GC        | 80                                     | 48                                            | S5           |
| Pt @CoS                                            | GC        | 31                                     | 28                                            | S6           |
| Pt-Co/CoO <sub>x</sub>                             | GC        | 29.3                                   | 28                                            | S7           |
| PtNi-NC-900                                        | GC        | 43.2                                   | 37.4                                          | S8           |
| Pt/MXene                                           | GC        | 29.7                                   | 34                                            | S9           |
| MoS <sub>2</sub> -NTA                              | AAO       | 35                                     | 32                                            | S10          |
| Pt-PdO/C                                           | GC        | 36                                     | 29                                            | S11          |
| RuSe <sub>2</sub> /Co-N-C-5                        | GC        | 53.2                                   | 26.4                                          | This<br>work |

## Supplementary References

- S1. Y. Che, B. Lu, H. Chen, J. Zhai, K. Wang, H. Chang and Z. Liu, *ACS Applied Energy Materials*, 2022, **5**, 6080-6090.
- S2. D. Chen, R. Lu, Y. Yao, D. Wu, H. Zhao, R. Yu, Z. Pu, P. Wang, J. Zhu, J. Yu, P. Ji, Z. Kou, H. Tang and S. Mu, *Journal of Materials Chemistry A*, 2022, **10**, 7637-7644.
- S3. Y. Zhao, H. Cong, P. Li, D. Wu, S. Chen and W. Luo, *Angewandte Chemie International Edition*, 2021, **60**, 7013-7017.
- S4. W. Zhan, N. Li, S. Zuo, Z. Guo, C. Qiang, Z. Lia and J. Ma, *CrystEngComm*, 2022, **24**, 620-627.
- S5. D. Li, M. Zha, L. Feng, G. Hu, C. Hu, X. Wu and X. Wang, *Nanoscale*, 2022, **14**, 790-796.
- S6. A. Mosallanezhad, C. Wei, P. A. Koudakan, Y. Fang, S. Niu, Z. Bian, B. Liu, T. Huang, H. Pan and G. Wang, *Applied Catalysis B: Environmental*, 2022, **315**, 121534.
- S7. Y. Wang, W. Wu, R. Chen, C. Lin, S. Mu and N. Cheng, 2022, **15**, 4958–4964.
- S8. J. Guo, J. Liu, X. Zhang, X. Guan, M. Zeng, J. Shen, J. Zou, Q. Chen, T. Wanga and D. Qian, *Journal of Materials Chemistry A*, 2022, **10**, 13727-13734.
- S9. Y. Wu, W. Wei, R. Yu, L. Xia, X. Hong, J. Zhu, J. Li, L. Lv, W. Chen, Y. Zhao, L. Zhou and L. Mai, *Advanced Functional Materials*, 2022, **32**, 2110910.
- S10. S. Jiao, M. Kong, Z. Hu, S. Zhou, X. Xu and L. Liu, *Small*, 2022, **18**, 2105129.
- S11. R. Samanta, R. Mishra, S. Barman, *ACS Sustainable Chemistry & Engineering*, 2022, **10**, 3704–3715.
